# Supplementary material for: The unfolded protein response components IRE1α and XBP1 promote human coronavirus infection
Source: PubMed Central journal article supplement (PMC10470493; doi:10.1128/mbio.00540-23), 2023-06-12
Supplement: mbio.00540-23-s0001.pdf [file mbio.00540-23-s0001.pdf]

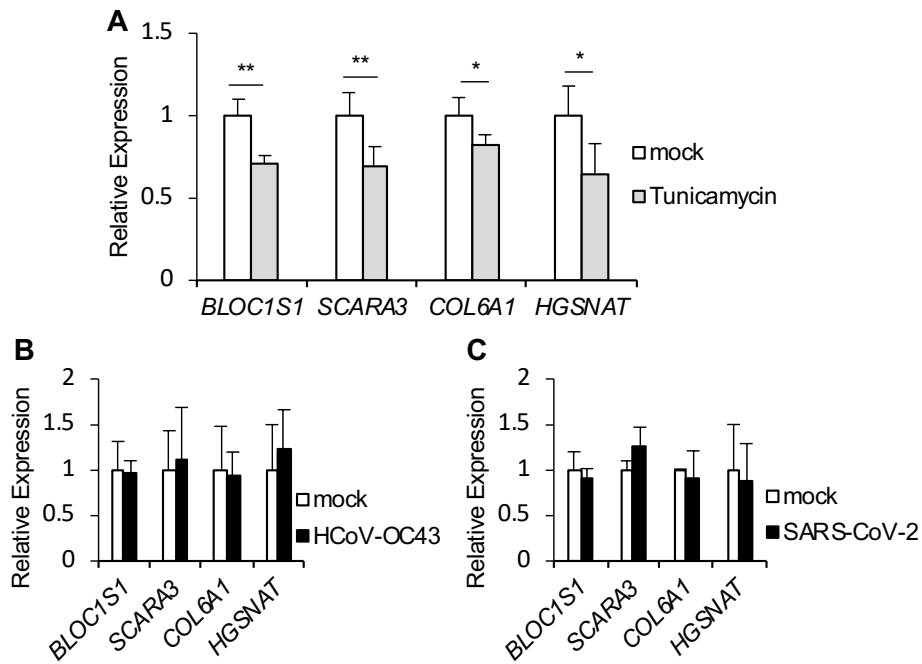

Supplemental Figure 1. **Regulated IRE1 $\alpha$ -dependent decay (RIDD) is not activated by HCoV-OC43 or SARS-CoV-2 infection.** (A-C) Quantitative RT-PCR was used to determine the relative abundance of RIDD-targets *BLOC1S1*, *SCARA3*, *COL6A1*, and *HGSNAT* in RNA from (A) HCT-8 cells treated with the ER stress-inducing agent, tunicamycin for 5 hours, (B) HCT-8 cells infected with HCoV-OC43 for 48 hours, or (C) Calu-3 cells infected with SARS-CoV-2 for 48 hours. Data are means  $\pm$  SD of four replicates and are representative of two independent experiments. \* $P < 0.05$ , \*\* $P < 0.01$ , by unpaired  $t$  test.
