# Supplementary material for: The unfolded protein response components IRE1α and XBP1 promote human coronavirus infection
Source: PubMed Central journal article supplement (PMC10470493; doi:10.1128/mbio.00540-23), 2023-06-12
Supplement: mbio.00540-23-s0002.pdf [file mbio.00540-23-s0002.pdf]

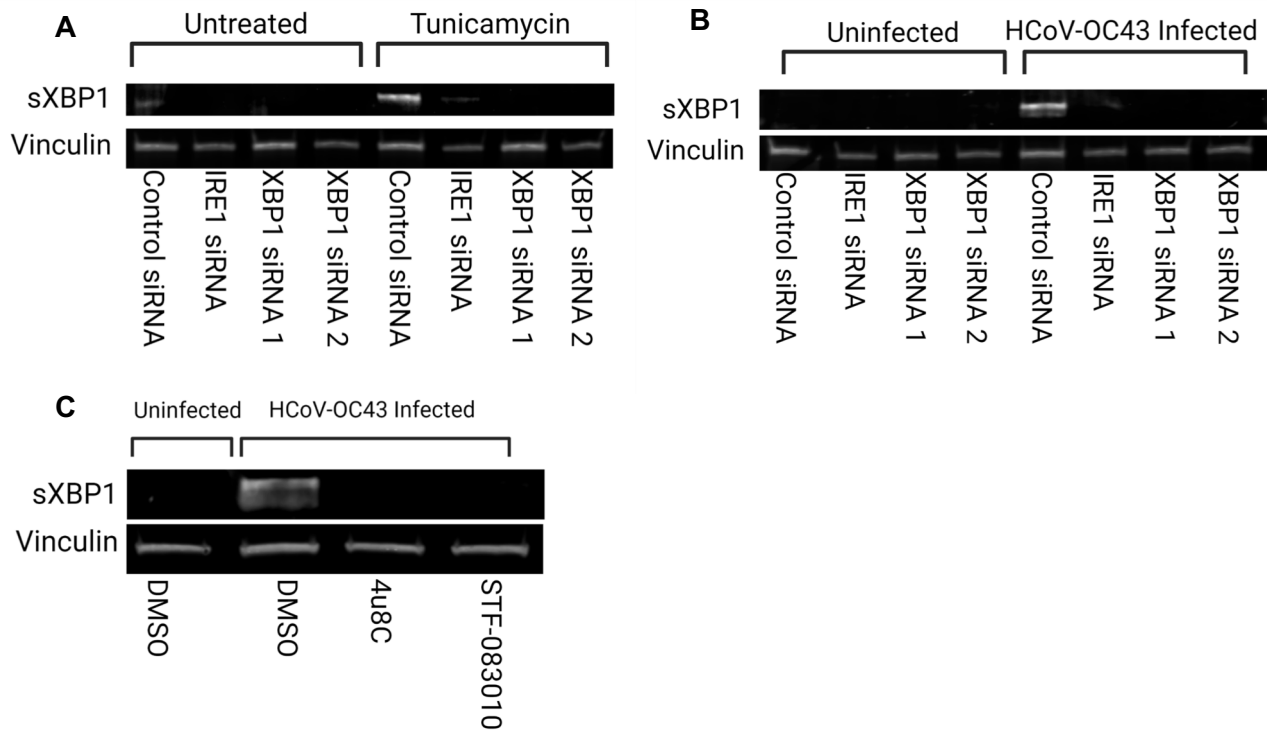

Supplemental Figure 2. **IRE1 $\alpha$  small molecule inhibitors and transfection of XBP1 and IRE $\alpha$  siRNA effectively knock down sXBP1 protein. (A+B)** HCT-8 cells were transfected with siRNA targeting XBP1, IRE1 $\alpha$ , or non-targeting control siRNA and then treated with tunicamycin (**A**) or infected with HCoV-OC43 (**B**). (**C**) HCT-8 cells were pretreated with DMSO or IRE1 $\alpha$  small molecule inhibitors and then infected with HCoV-OC43. Protein was harvested 5 hours after tunicamycin treatment (**A**) or 48 hours after HCoV-OC43 infection (**B+C**). The abundance of sXBP1 protein and vinculin loading control were evaluated by Western blot. Data are representative of two independent experiments.
