# Supplementary material for: The unfolded protein response components IRE1α and XBP1 promote human coronavirus infection
Source: PubMed Central journal article supplement (PMC10470493; doi:10.1128/mbio.00540-23), 2023-06-12
Supplement: mbio.00540-23-s0003.pdf [file mbio.00540-23-s0003.pdf]

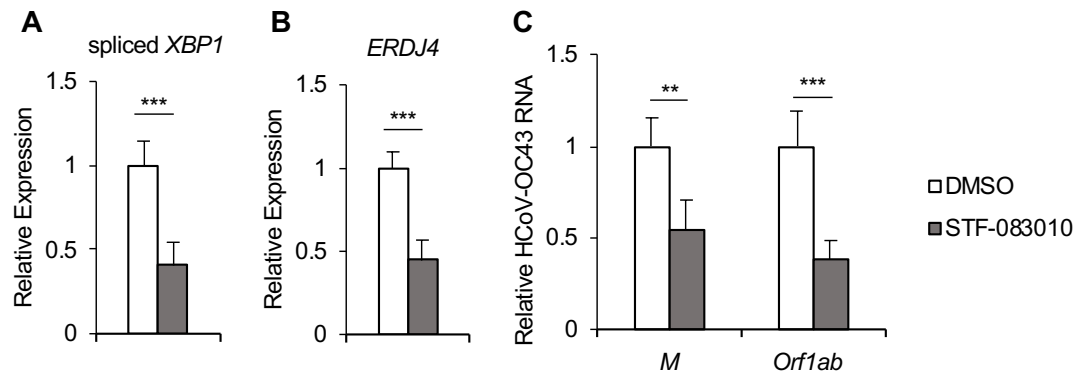

Supplemental Figure 3. **IRE1 $\alpha$  is required for optimal HCoV-OC43 infection. (A-C)** HCT-8 cells were treated with IRE1 $\alpha$  nuclease inhibitor STF-083010 or DMSO solvent control prior to infection with HCoV-OC43. RNA was harvested 48 hours post-infection and the relative abundance of spliced *XBP1* (A), *ERDJ4* (B), and HCoV-OC43 viral RNA (C) were determined by quantitative RT-PCR. Data are means  $\pm$  SD of four replicates and are representative of three independent experiments. \* $P$  < 0.05, \*\* $P$  < 0.01, \*\*\* $P$  < 0.001, by unpaired  $t$  test.
