# Supplementary material for: The unfolded protein response components IRE1α and XBP1 promote human coronavirus infection
Source: PubMed Central journal article supplement (PMC10470493; doi:10.1128/mbio.00540-23), 2023-06-12
Supplement: mbio.00540-23-s0005.pdf [file mbio.00540-23-s0005.pdf]

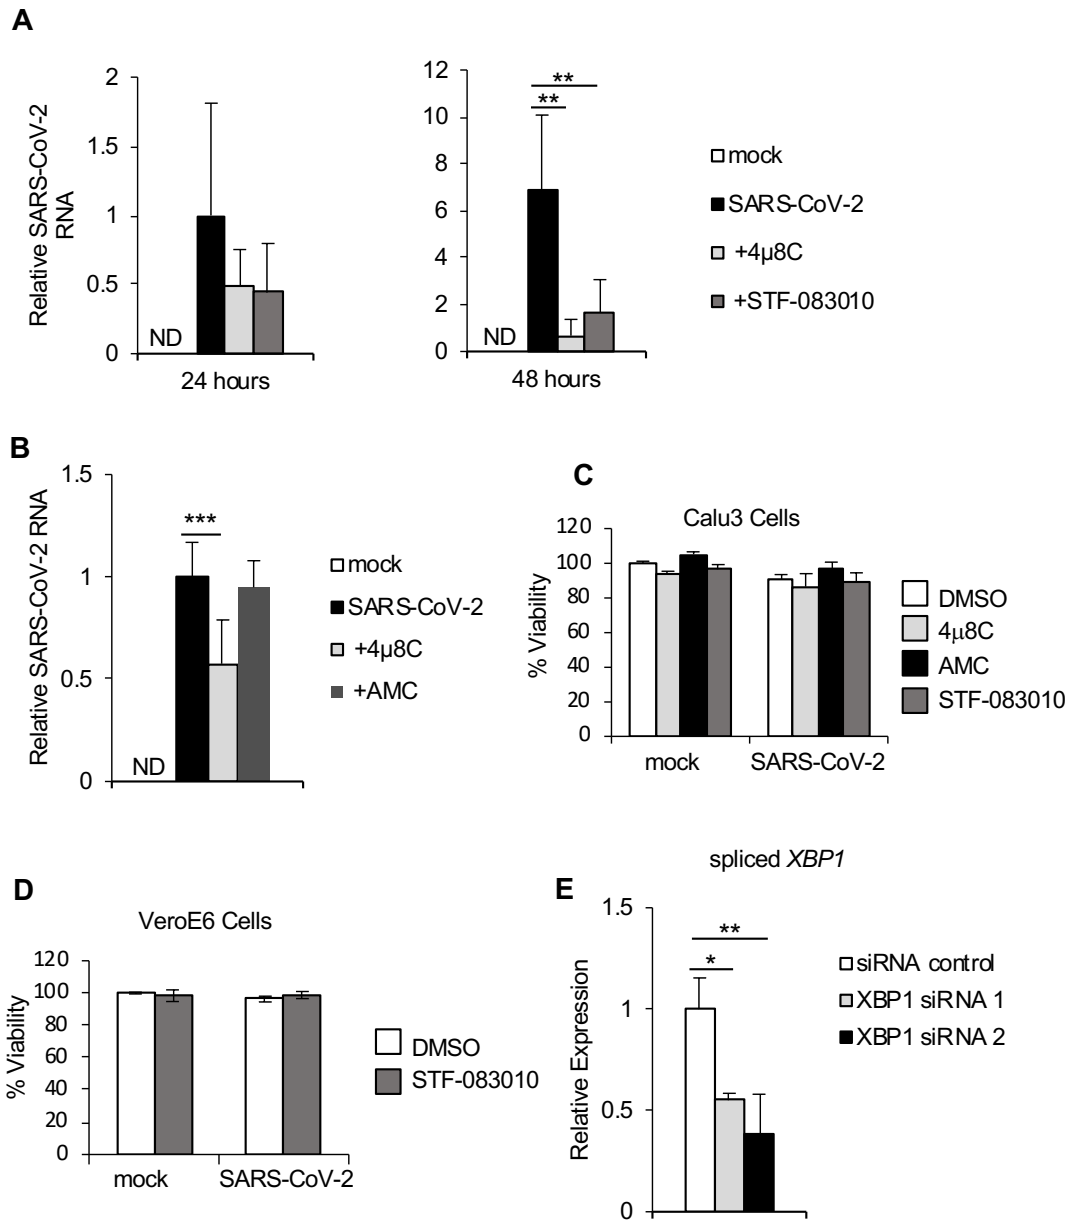

Supplemental 5. **IRE1 $\alpha$  inhibitors are not cytotoxic and decrease SARS-CoV-2 viral RNA.** (A) Calu3 cells were treated with IRE1 $\alpha$  nuclease inhibitors 4 $\mu$ 8C, STF-0803010 or DMSO solvent control prior to infection with SARS-CoV-2 at an MOI of 0.01. RNA was harvested at 24 and 48 hours post infection and relative abundance of SARS-CoV-2 RNA was determined by RT-PCR. (B) Calu3 cells were treated with IRE1 $\alpha$  nuclease inhibitor 4 $\mu$ 8C, structurally similar negative control AMC, IRE1 $\alpha$  nuclease inhibitor STF-083010 or DMSO solvent control prior to infection with SARS-CoV-2 at an MOI of 1. RNA was harvested 24 hours post-infection and relative abundance of SARS-CoV-2 RNA was determined by quantitative RT-PCR. (C) Calu3 and (D) VeroE6 cells were treated with IRE1 $\alpha$  nuclease inhibitor 4 $\mu$ 8C, structurally similar negative control AMC, IRE1 $\alpha$  nuclease inhibitor STF-083010 or DMSO solvent control prior to infection with SARS-CoV-2. Viability was measured 48 hours post-infection. (E) Calu3 cells were transfected with siRNA targeting XBP1 or nontargeting control siRNA prior to SARS-CoV-2 infection and measurement of viral RNA by quantitative RT-PCR. Relative abundant XBP1s RNA was quantified by RT-PCR. \* $P < 0.05$ , \*\* $P < 0.01$ , \*\*\* $P < 0.001$  by unpaired  $t$  test.
