# Supplementary material for: The unfolded protein response components IRE1α and XBP1 promote human coronavirus infection
Source: PubMed Central journal article supplement (PMC10470493; doi:10.1128/mbio.00540-23), 2023-06-12
Supplement: mbio.00540-23-s0006.pdf [file mbio.00540-23-s0006.pdf]

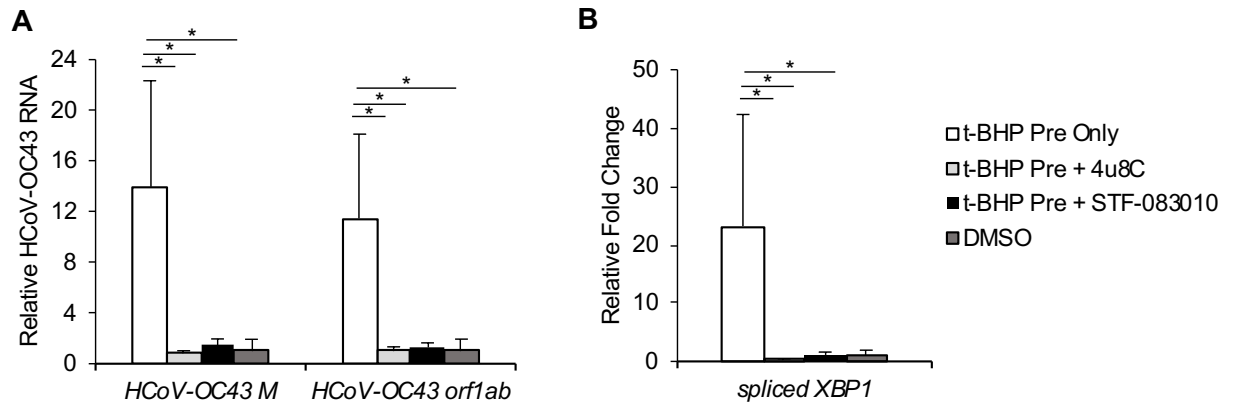

Supplemental Figure 6. **Pretreatment with *tert*-butyl hydroperoxide paired with small IRE1 $\alpha$  inhibitor reverses boost in HCoV-OC43 viral RNA production.** HCT-8 cells were treated with *tert*-butyl hydroperoxide (t-BHP) pretreatment alone, t-BHP and small molecule IRE1 $\alpha$  inhibitors, or DMSO control 2 hours prior to infection with HCoV-OC43. RNA was harvested 48 hours post-infection and the relative abundance of HCoV-OC43 viral RNA (**A**) and spliced XBP1 (**B**) were determined by quantitative RT-PCR. Data are means  $\pm$  SD of four replicates and are representative of two independent experiments. \* $P < 0.05$  by unpaired *t* test.
